# Supplementary material for: The fibrin-derived peptide Bβ15–42 protects the myocardium against ischemia-reperfusion injury
Source: Springer Nature journal article supplement (doi:10.1038/nm1198), 2005-02-20
Supplement: nm1198-S5.pdf [file nm1198-S5.pdf]

| <b>B<math>\beta</math><sub>15-42</sub> (<math>\mu</math>g/ml)</b> | <b>0.0</b> | <b>13.3</b> | <b>26.7</b> | <b>40.0</b> |
|-------------------------------------------------------------------|------------|-------------|-------------|-------------|
| <b>Fibrinogen (g/dl)</b>                                          | 31.0       | 33.0        | 29.0        | 26.0        |
| <b>Prothrombin time (s)</b>                                       | 13.0       | 12.3        | 13.7        | 14.3        |
| <b>Activated partial thromboplastin (s)</b>                       | 20.9       | 22.0        | 20.6        | 20.0        |
| <b>Thrombin Time (s)</b>                                          | 28.0       | 24.0        | 27.1        | 24.9        |

**Supplementary Table 1** Effects of B $\beta$ <sub>15-42</sub> on clotting parameters in the rat ( *n* = 3 / group).
